# Supplementary material for: Surgical treatment of benign osteolytic lesions in the femoral head and neck: a systematic review
Source: PubMed Central journal article supplement (PMC8210383; doi:10.1186/s12891-021-04442-y), 2021-06-16
Supplement: 12891_2021_4442_MOESM1_ESM.pdf [file 12891_2021_4442_MOESM1_ESM.pdf]

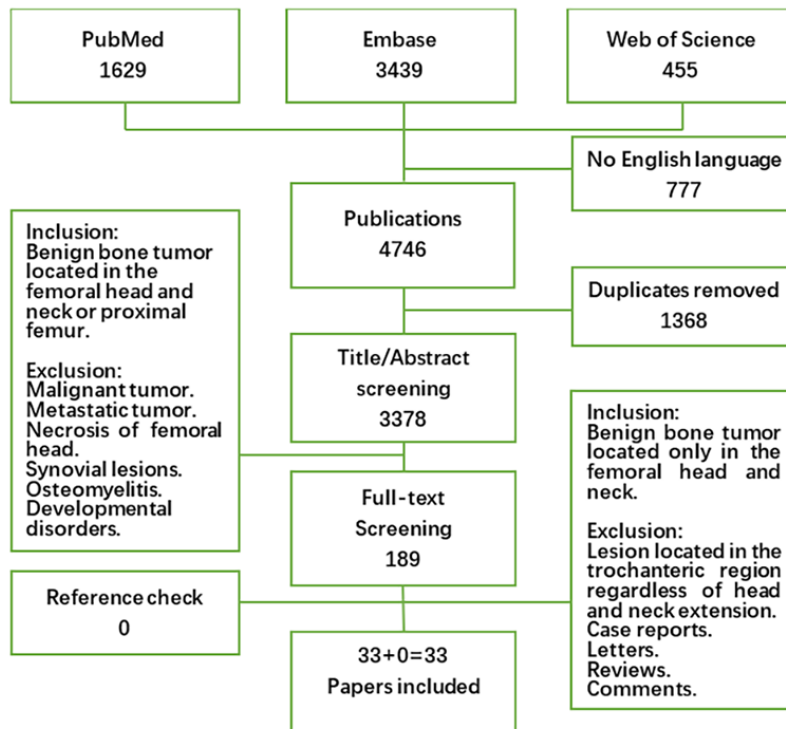

Figure S1. The flowchart shows steps for literatures search and selection.
